# Supplementary material for: Self-sustaining, fluorescent and semi-conducting co-assembled organogel of Fmoc protected phenylalanine with aromatic amines
Source: Royal Society of Chemistry journal article supplement (doi:10.1039/c2sm25673h), 2012-01-01
Supplement: c2sm25673h.pdf [file c2sm25673h.pdf]

## **Supporting Information**

### **Self-sustaining, Fluorescent, Semi-conducting Co-assembled Organogel of Fmoc Protected Phenylalanine with Aromatic Amines**

Partha Bairi, Bappaditya Roy, Parimal Routh, Kaushik Sen and Arun K. Nandi\*

Polymer Science Unit,  
Indian Association for the cultivation of Science,  
Jadavpur, Kolkata-700 032, INDIA

\* For correspondence: email [psuakn@mahendra.iacs.res.in](mailto:psuakn@mahendra.iacs.res.in)

**SI.Table: 1** Dynamic rheology of F, FAA and FNA gels. The  $G'$  and  $G''$  values shown in the table are obtained from frequency sweep experiments and  $\sigma^*$  is obtained from oscillator stress experiment.

| Sample          | $G'$ Pa | $G''$ Pa | $G'-G''$ | $G'/G''$ | $\sigma^*$ Pa |
|-----------------|---------|----------|----------|----------|---------------|
| <b>F</b> gel    | 882     | 291      | 591      | 3.0      | 4             |
| <b>F-AA</b> gel | 82660   | 11470    | 71190    | 7.2      | 160           |
| <b>F-NA</b> gel | 1478    | 841      | 636      | 1.7      | 7.5           |

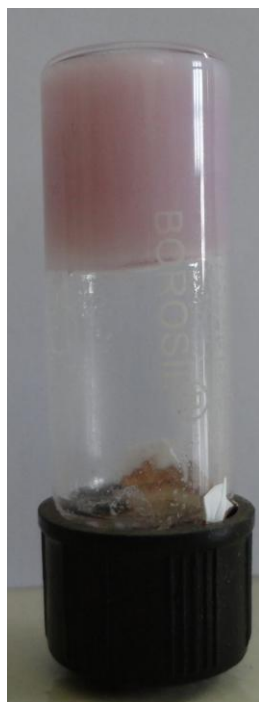

**SI Fig-1:** Photograph of F-NA organogel

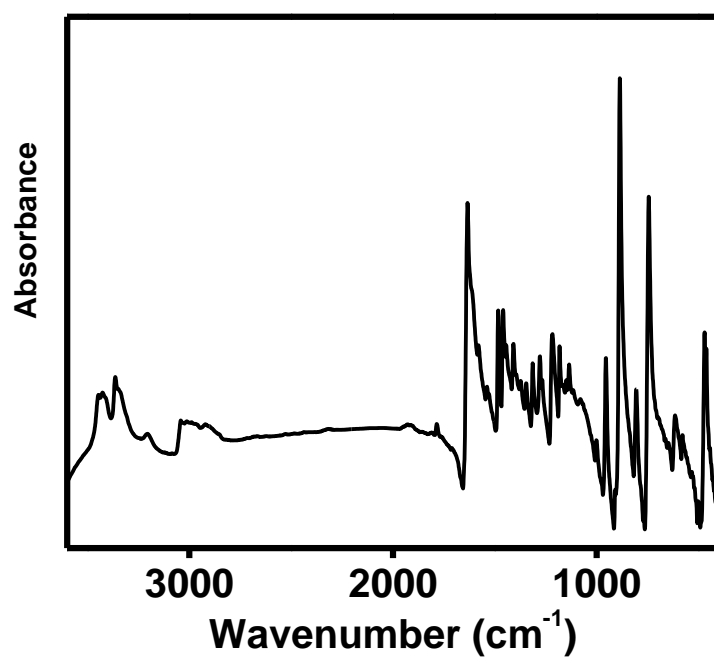

**SI fig-2:** FTIR spectra of pure AA

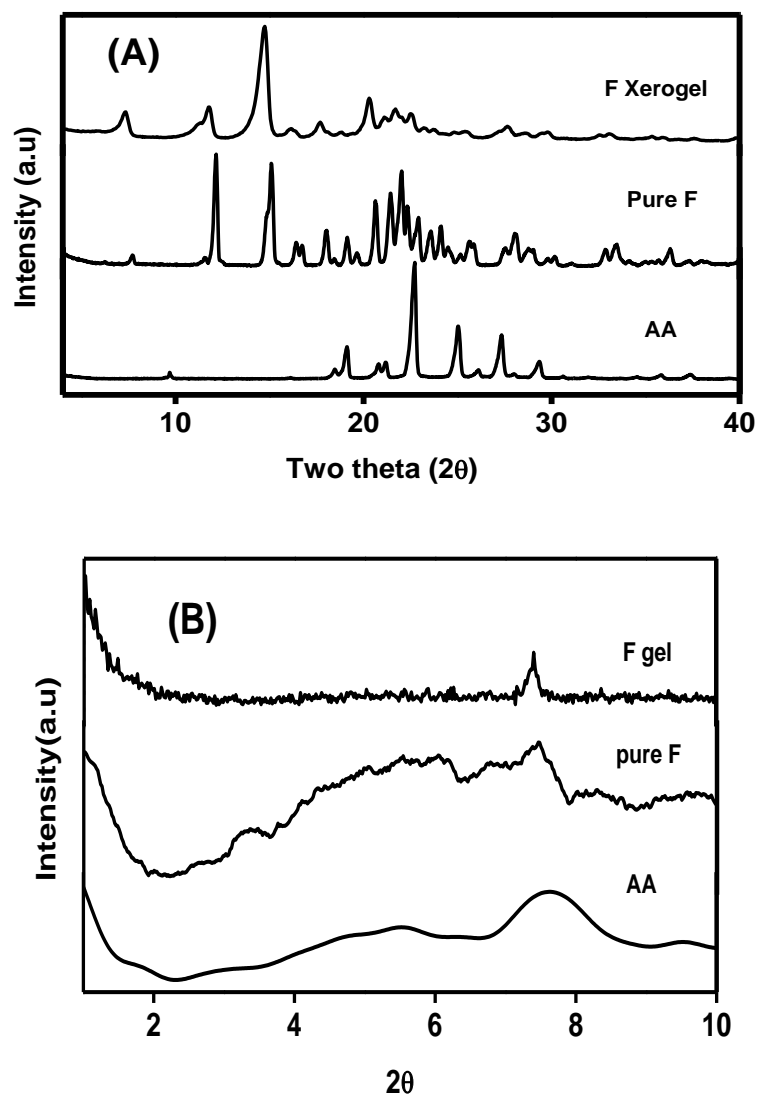

**SI fig-3:** (A) WAXS pattern of pure AA, pure F and F xerogel. (B) Comparison of SAXS diffraction pattern of F xerogel with those of pure F and AA.

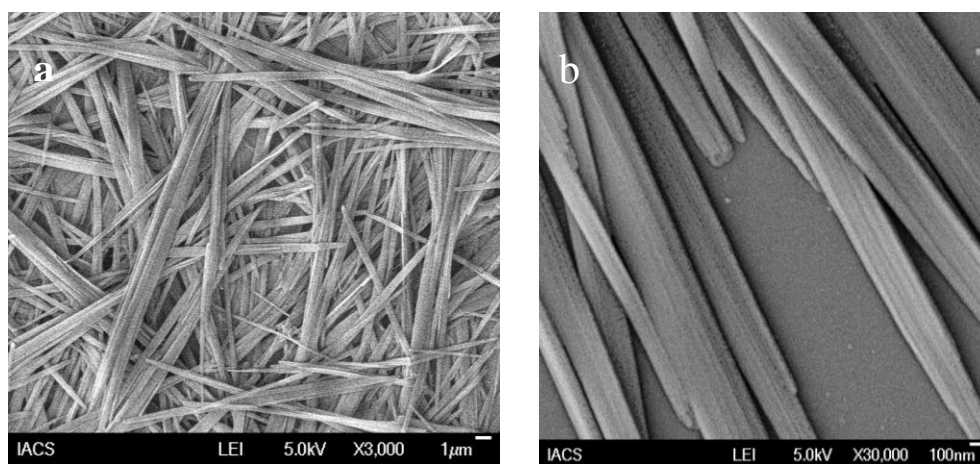

**SI Fig-4:** FESEM images of F-NA xerogels 1.5% (w/v) at different magnifications.

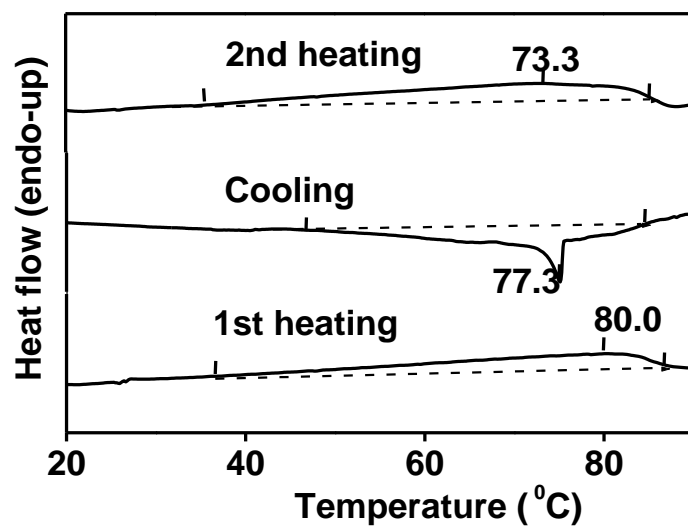

**SI fig-5** DSC thermogram of F organogel concentration at 1.5% (w/v)

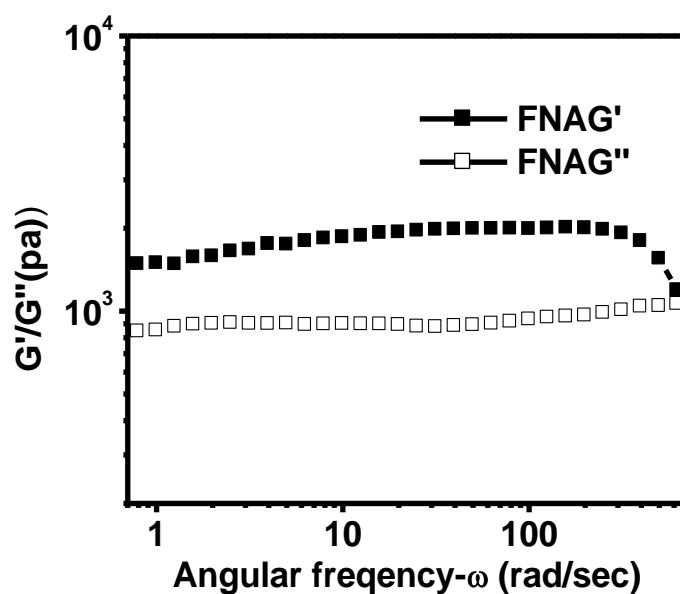

**SI Fig-6a** Storage modulus ( $G'$ ) and Loss modulus ( $G''$ ) vs angular frequency plot at a concentration of 1.5 % (w/v) of F-NA



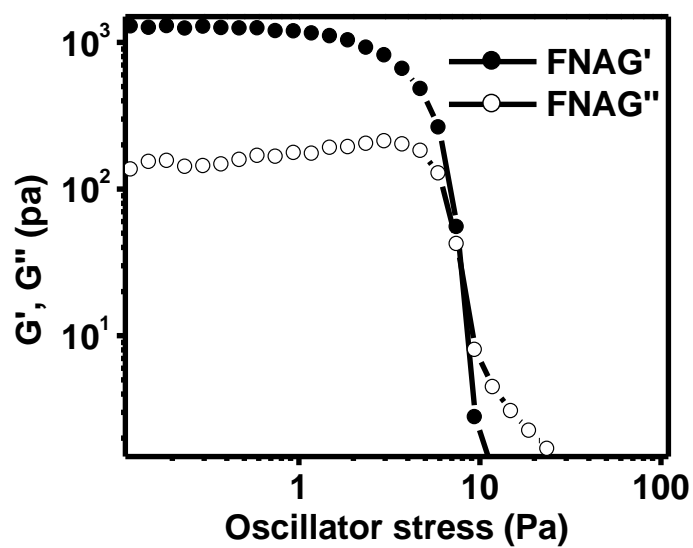

**SI Fig-6b**  $G'$  and  $G''$  vs. oscillator stress plot at a constant frequency of 1Hz of the F-NA organogels at a concentration of 1.5 % (w/v) at 30°C.

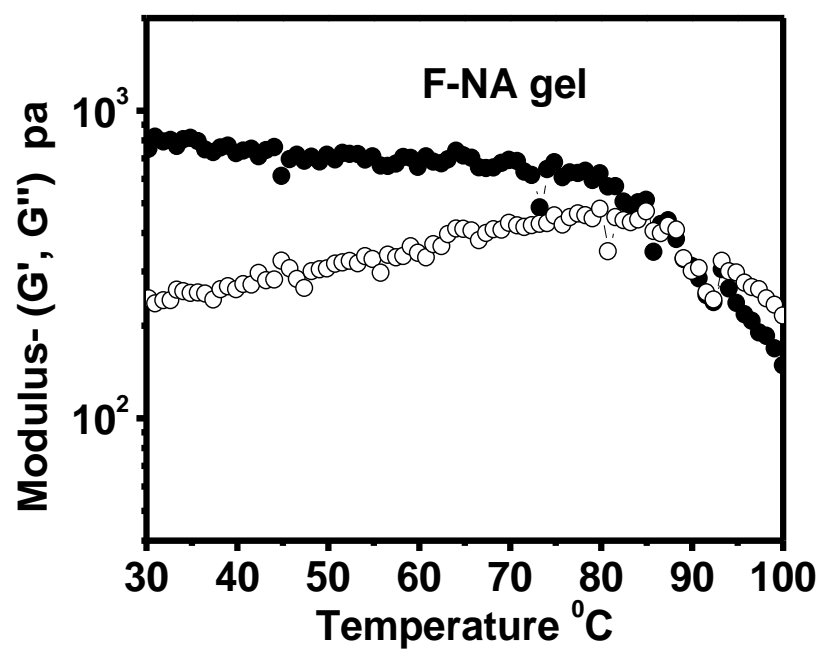

**SI fig 6c** G' and G'' vs. temperature plot at a constant frequency of 1Hz of the F-NA organogel at a concentration of 1.5 % (w/v).

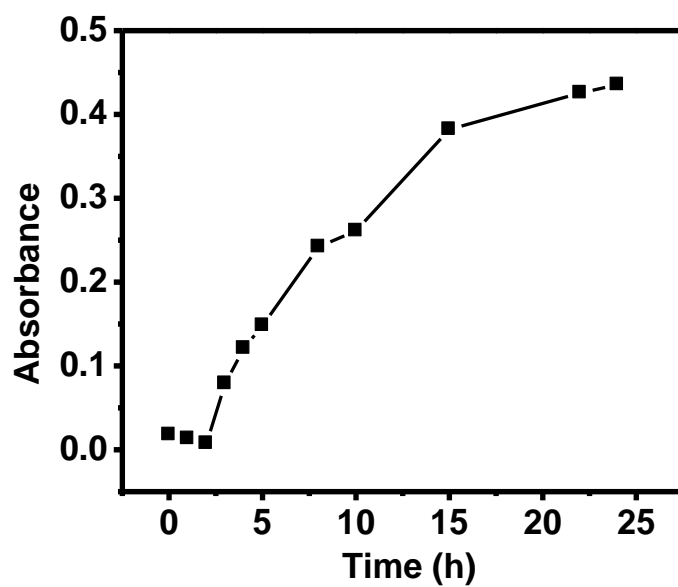

**SI fig 7** Absorbance vs time plot of F-AA complex at concentration 1.5% (w/v).

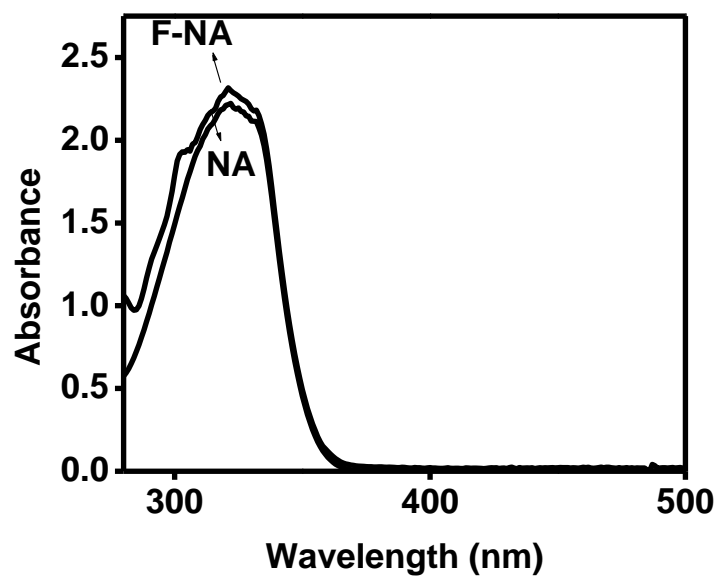

**SI fig 8** UV-vis spectra of F-NA complex and pure NA in toluene medium at 0.2 % (w/v) NA concentration.

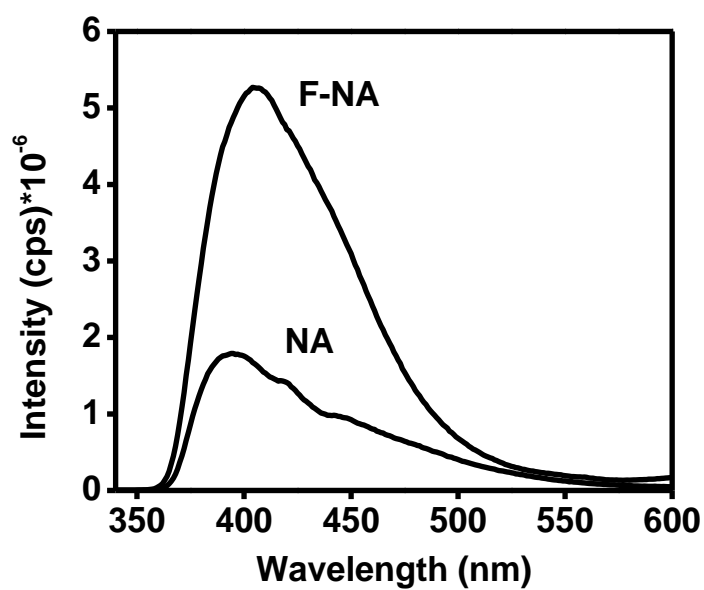

**SI fig 9** Photoluminescence spectra of pure NA and F-NA organogel at 1.5% (w/v) excited at 320nm.

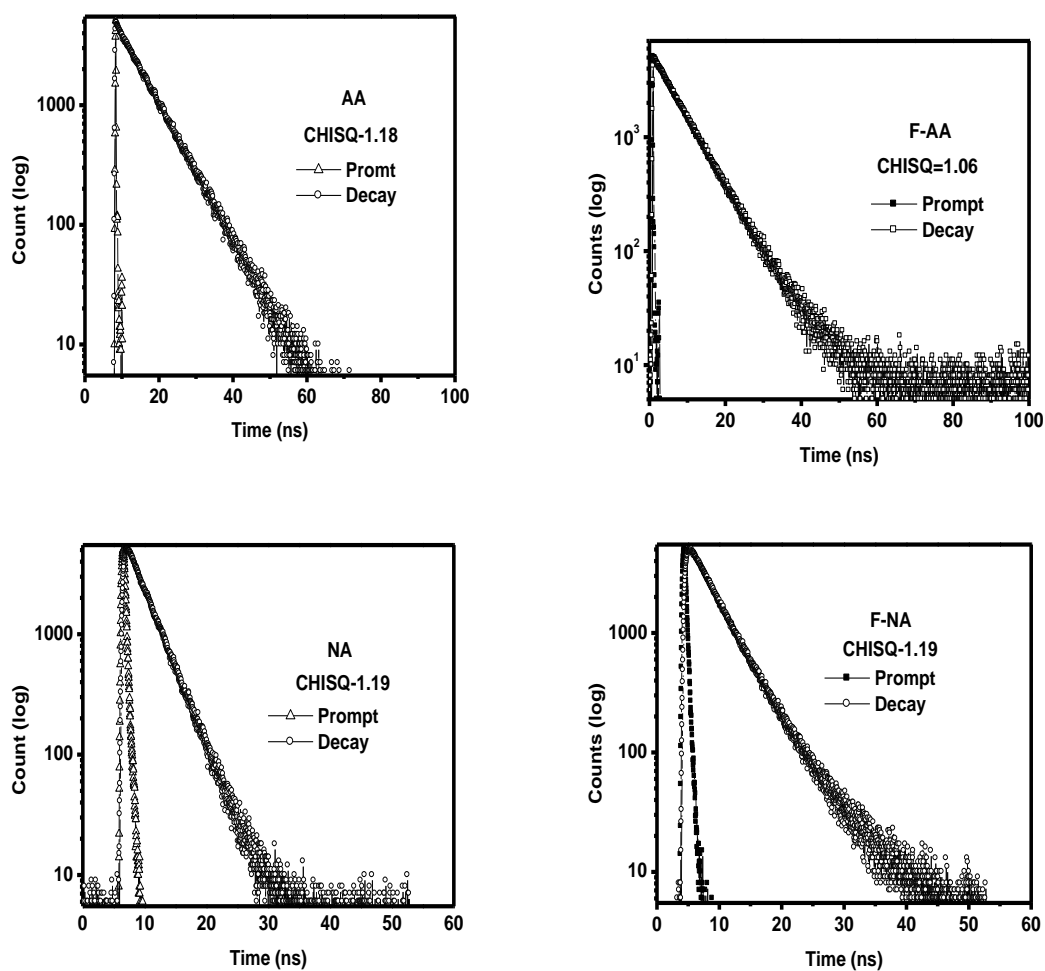

**SI fig 10** Fluorescence decay curves of pure AA, NA and Co-assembled gel F-AA, F-NA.

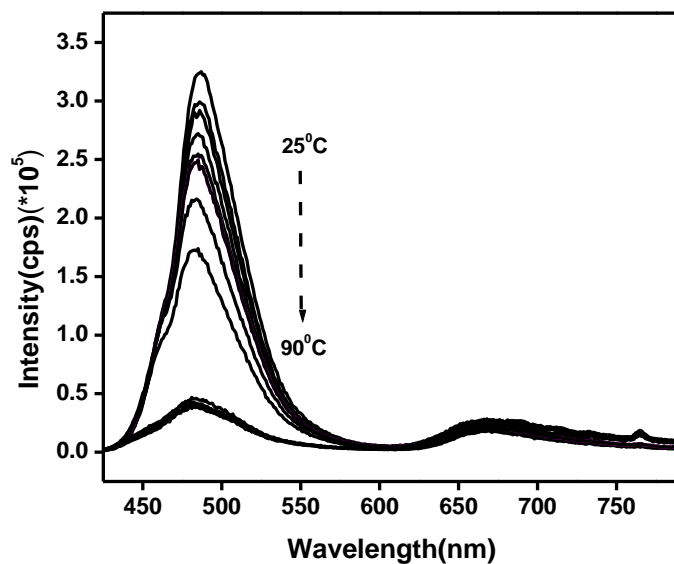

**SI-Fig.11** Temperature dependent photoluminescence spectra of F-AA organogel at 1.5% (w/v) excited at 405nm.
